# Supplementary material for: Secretagogin expression in the mouse olfactory bulb under sensory impairments
Source: PubMed Central journal article supplement (PMC7726155; doi:10.1038/s41598-020-78499-5), 2020-12-09
Supplement: 41598_2020_78499_MOESM1_ESM.pdf [file 41598_2020_78499_MOESM1_ESM.pdf]

## **Secretagoin expression in the mouse olfactory bulb under sensory impairments**

### **Authors' Names and Institutions:**

L. Pérez-Revuelta<sup>1,2</sup>, P. G. Téllez de Meneses<sup>1,2</sup>, M. López, J.G. Briñón<sup>1,2</sup>, E. Weruaga<sup>1,2</sup>, D. Díaz<sup>1,2,CA</sup> and J.R. Alonso<sup>1,2</sup>

1 Laboratory of Neuronal Plasticity and Neurorepair, Institute for Neuroscience of Castile and Leon (INCyL), University of Salamanca, Salamanca, 37007, Spain.

2 Institute of Biomedical Research of Salamanca, IBSAL, Salamanca, 37007, Spain.

### **<sup>CA</sup> Corresponding author:**

Dr. D. Díaz, Institute for Neuroscience of Castile and Leon, Universidad de Salamanca, C/ Pintor Fernando Gallego, 1, E-37007, Salamanca, Spain.

E-mail: [ddiaz@usal.es](mailto:ddiaz@usal.es); phone: +34 923 294500 ext. 5326

**CAUDAL**

|            |          | <b>Control</b> |        | <b>Deprived</b> |        |                 | <b>PCD</b> |        |                 |
|------------|----------|----------------|--------|-----------------|--------|-----------------|------------|--------|-----------------|
|            |          | Mean           | SEM    | Mean            | SEM    | <i>p</i> -value | Mean       | SEM    | <i>p</i> -value |
| <b>GL</b>  | Whole OB | 1047.35        | 128.10 | 1519.31         | 175.41 | 0.165           | 1231.15    | 116.74 | 0.201           |
|            | Dorsal   | 982.13         | 153.98 | 1581.32         | 194.51 | 0.066           | 946.32     | 158.24 | 1.000           |
|            | Medial   | 886.38         | 160.45 | 1635.33         | 172.90 | 0.183           | 1318.99    | 203.89 | 0.136           |
|            | Ventral  | 934.69         | 271.25 | 1506.97         | 138.03 | 0.138           | 1316.27    | 210.64 | 0.149           |
|            | Lateral  | 1553.09        | 214.32 | 1510.88         | 185.18 | 0.740           | 1348.77    | 129.92 | 0.522           |
| <b>EPL</b> | Whole OB | 35.45          | 8.12   | 59.27           | 8.82   | 0.118           | 112.39     | 31.36  | 0.068           |
|            | Dorsal   | 5.95           | 5.95   | 76.01           | 28.98  | 0.239           | 105.57     | 48.78  | 0.180           |
|            | Medial   | 31.15          | 16.41  | 56.86           | 20.38  | 0.221           | 120.52     | 43.48  | 0.131           |
|            | Ventral  | 16.01          | 9.83   | 37.54           | 29.43  | 0.102           | 131.30     | 52.64  | 0.062           |
|            | Lateral  | 88.40          | 17.20  | 68.58           | 21.21  | 0.745           | 88.75      | 32.74  | 0.522           |
| <b>IML</b> | Whole OB | 929.50         | 94.94  | 1749.30         | 66.06  | <b>0.005</b>    | 1004.52    | 114.76 | 0.831           |
|            | Dorsal   | 1044.14        | 155.99 | 1750.29         | 113.23 | <b>0.009</b>    | 1046.93    | 145.56 | 0.624           |
|            | Medial   | 827.62         | 96.62  | 1714.21         | 87.66  | <b>0.007</b>    | 1130.06    | 127.85 | 0.136           |
|            | Ventral  | 871.92         | 87.07  | 2017.40         | 191.82 | <b>0.008</b>    | 955.27     | 115.70 | 0.394           |
|            | Lateral  | 914.34         | 171.98 | 1570.67         | 74.81  | <b>0.025</b>    | 955.04     | 166.40 | 0.831           |

**ROSTRAL**

|            |          | <b>Control</b> |        | <b>Deprived</b> |        |                 | <b>PCD</b> |        |                 |
|------------|----------|----------------|--------|-----------------|--------|-----------------|------------|--------|-----------------|
|            |          | Mean           | SEM    | Mean            | SEM    | <i>p</i> -value | Mean       | SEM    | <i>p</i> -value |
| <b>GL</b>  | Whole OB | 1386.43        | 251.08 | 2327.03         | 316.91 | 0.053           | 2447.31    | 251.34 | 0.053           |
|            | Dorsal   | 1622.30        | 634.76 | 2097.23         | 330.84 | 0.053           | 2195.82    | 490.87 | 0.180           |
|            | Medial   | 2150.25        | 708.25 | 2451.41         | 591.99 | 0.881           | 2274.25    | 355.34 | 0.297           |
|            | Ventral  | 1068.40        | 439.33 | 2112.04         | 713.01 | 0.297           | 1919.60    | 450.00 | 0.101           |
|            | Lateral  | 822.01         | 491.61 | 2647.43         | 505.26 | 0.071           | 3342.50    | 878.03 | 0.071           |
| <b>EPL</b> | Whole OB | 150.13         | 21.82  | 159.69          | 60.88  | 0.655           | 237.70     | 92.55  | 0.881           |
|            | Dorsal   | 262.89         | 131.56 | 292.76          | 216.97 | 0.647           | 300.07     | 163.99 | 0.764           |
|            | Medial   | 93.75          | 76.55  | 167.05          | 41.72  | 0.131           | 97.50      | 66.15  | 0.864           |
|            | Ventral  | 43.13          | 43.13  | 109.58          | 52.53  | 0.285           | 315.03     | 95.87  | 0.266           |
|            | Lateral  | 168.36         | 138.73 | 69.39           | 16.90  | 0.439           | 256.10     | 74.17  | 1.000           |
| <b>IML</b> | Whole OB | 1506.10        | 232.71 | 2045.40         | 135.55 | 0.101           | 1812.31    | 129.33 | 0.180           |
|            | Dorsal   | 1352.39        | 262.65 | 2160.39         | 311.71 | 0.101           | 2162.91    | 317.43 | 0.101           |
|            | Medial   | 1504.22        | 251.99 | 1976.92         | 155.06 | 0.180           | 2152.09    | 159.13 | 0.053           |
|            | Ventral  | 1606.93        | 449.04 | 2225.49         | 314.00 | 0.180           | 1698.74    | 92.42  | 0.655           |
|            | Lateral  | 1745.42        | 454.67 | 1818.81         | 81.57  | 0.655           | 1235.48    | 265.17 | 0.456           |
